# Supplementary material
Source: PubMed Central journal article supplement (PMC4264537)
Supplement: NIHMS635680-supplement-Supp_TableS1-S5___FigureS1-S8.pdf [file NIHMS635680-supplement-Supp_TableS1-S5___FigureS1-S8.pdf]

## **Supporting Information**

**The CsoR-like sulfurtransferase repressor (CstR) is a persulfide sensor in *Staphylococcus aureus***

Luebke *et al.*

This file contains **Supporting Tables S1-S5** and **Supporting Figures S1-S8**.

**Table S1.** Summary of tetrameric CstR association equilibrium constants ( $K_{\text{tet}}$ ) for *cst* OP1 obtained from fluorescence anisotropy titrations obtained in this study and others. All experiments performed with fluorescently labeled *cst* OP1 unless otherwise noted. Conditions: 10 mM HEPES, pH 7.0, 200 mM NaCl, 25.0 °C.

| Protein                               | $K_{\text{tet}} (\times 10^7) \text{ M}^{-1}$ |
|---------------------------------------|-----------------------------------------------|
|                                       | 6.3 ( $\pm 0.5$ ) <sup>a</sup>                |
|                                       | 25 ( $\pm 5$ ) <sup>b</sup>                   |
| CstR <sup>RSH</sup>                   | 6 ( $\pm 5$ ) <sup>b*</sup>                   |
|                                       | 10 ( $\pm 9$ ) <sup>b†</sup>                  |
|                                       | 7.4 ( $\pm 1.8$ ) <sup>c</sup>                |
| CstR + NaHS                           | 0.06 ( $\pm 0.05$ ) <sup>c</sup>              |
| CstR + Na <sub>2</sub> S <sub>4</sub> | 0.03 ( $\pm 0.03$ ) <sup>c</sup>              |
| CstR:Cu(I)                            | 4.3 ( $\pm 1.7$ ) <sup>c</sup>                |
| C31A CstR                             | 3.3 ( $\pm 0.7$ ) <sup>a</sup>                |
| S-Me C31A CstR <sup>§</sup>           | 2.0 ( $\pm 0.5$ ) <sup>a</sup>                |
| C60A CstR                             | 4.2 ( $\pm 1.0$ ) <sup>a</sup>                |
| S-Me C60A CstR <sup>§</sup>           | 0.31 ( $\pm 0.03$ ) <sup>a</sup>              |

<sup>a</sup>From reference (Luebke *et al.*, 2013)

<sup>b</sup>From reference (Grossoehme *et al.*, 2011)

<sup>c</sup>This study

\* Determined from competitive dissociation with unlabeled competitors

† CstR-*cst* OP2 binding affinity

§ Prepared by reaction with methylmethanethiolsulfonate (MMTS) (Luebke *et al.*, 2013)

**Table S2.** Summary of LC-ESI-MS deconvoluted masses following reaction with the indicated compound. All mass shifts are relative to either the reduced ( $CstR^{RS-H}$ ) or disulfide bonded form of CstR ( $CstR_2^{RS-SR'}$ ) as indicated by (-). Observed masses in *italics* represent masses observed in controls and in the starting masses.

| Protein                                                        | $M_r$ Observed (Da) | Mass Shift | Assignment                           | $M_r$ Expected (Da) |
|----------------------------------------------------------------|---------------------|------------|--------------------------------------|---------------------|
| CstR<br>Control                                                | <i>9640.2</i>       | -          | $CstR^{RS-H}$                        | <i>9641.2</i>       |
|                                                                | <i>9661.3</i>       | 21.1       | $CstR^{RS-H} + Na$                   | <i>9663.2</i>       |
|                                                                | <i>19279.3</i>      | -          | $CstR_2^{RS-SR'}$                    | <i>19280.4</i>      |
| CstR + 5x<br>NaHS                                              | <i>9640.0</i>       | -          | $CstR^{RS-H}$                        | <i>9641.2</i>       |
|                                                                | <i>9662.5</i>       | 22.5       | $CstR^{RS-H} + Na$                   | <i>9663.2</i>       |
|                                                                | <i>19279.7</i>      | -          | $CstR_2^{RS-SR'}$                    | <i>19280.4</i>      |
|                                                                | <i>19311.7</i>      | 32.0       | $CstR_2^{RS-S-SR', R''S-SR''}$       | <i>19312.5</i>      |
|                                                                | <i>19342.8</i>      | 63.1       | $CstR_2^{RS-S-SR', R''S-S-SR''}$     | <i>19344.5</i>      |
|                                                                | <i>19372.5</i>      | 92.8       | $CstR_2^{RS-S-S-SR', R''S-S-SR''}$   | <i>19376.6</i>      |
| CstR + 5x<br>Na <sub>2</sub> S <sub>4</sub>                    | <i>19403.7</i>      | 124.0      | $CstR_2^{RS-S-S-SR', R''S-S-S-SR''}$ | <i>19408.7</i>      |
|                                                                | <i>9642.5</i>       | -          | $CstR^{RS-H}$                        | <i>9641.2</i>       |
|                                                                | <i>19282.0</i>      | -          | $CstR_2^{RS-SR'}$                    | <i>19280.4</i>      |
|                                                                | <i>19313.9</i>      | 31.9       | $CstR_2^{RS-S-SR', R''S-SR''}$       | <i>19312.5</i>      |
|                                                                | <i>19346.5</i>      | 64.5       | $CstR_2^{RS-S-SR', R''S-S-SR''}$     | <i>19344.5</i>      |
|                                                                | <i>19378.9</i>      | 96.9       | $CstR_2^{RS-S-S-SR', R''S-S-SR''}$   | <i>19376.6</i>      |
| CstR + 5x<br>NaHS<br>(PO <sub>4</sub> <sup>3-</sup> +<br>EDTA) | <i>19410.0</i>      | 128.0      | $CstR_2^{RS-S-S-SR', R''S-S-S-SR''}$ | <i>19408.7</i>      |
|                                                                | <i>9640.1</i>       | -          | $CstR^{RS-H}$                        | <i>9641.2</i>       |
|                                                                | <i>9662.4</i>       | 22.3       | $CstR^{RS-H} + Na$                   | <i>9663.2</i>       |
|                                                                | <i>19279.0</i>      | -          | $CstR_2^{RS-SR'}$                    | <i>19280.4</i>      |
|                                                                | <i>9640.0</i>       | -          | $CstR^{RS-H}$                        | <i>9641.2</i>       |
| CstR + 5x<br>Na <sub>2</sub> S                                 | <i>9662.4</i>       | 22.4       | $CstR^{RS-H} + Na$                   | <i>9663.2</i>       |
|                                                                | <i>9684.5</i>       | 44.5       | $CstR^{RS-H} + 2Na$                  | <i>9665.2</i>       |
|                                                                | <i>19279.8</i>      | -          | $CstR_2^{RS-SR'}$                    | <i>19280.4</i>      |
|                                                                | <i>9640.0</i>       | -          | $CstR^{RS-H}$                        | <i>9641.2</i>       |
| CstR + 5x<br>GSSG                                              | <i>9662.2</i>       | 22.2       | $CstR^{RS-H} + Na$                   | <i>9663.2</i>       |
|                                                                | <i>9683.5</i>       | 43.5       | $CstR^{RS-H} + 2Na$                  | <i>9665.2</i>       |
|                                                                | <i>19280.0</i>      | -          | $CstR_2^{RS-SR'}$                    | <i>19280.4</i>      |
|                                                                | <i>19302.0</i>      | 22         | $CstR_2^{RS-SR'} + Na$               | <i>19302.4</i>      |
|                                                                | <i>9640</i>         | -          | $CstR^{RS-H}$                        | <i>9641.2</i>       |
| CstR + 5x<br>GSH                                               | <i>9662.3</i>       | 22.3       | $CstR^{RS-H} + Na$                   | <i>9663.2</i>       |
|                                                                | <i>19280.1</i>      | -          | $CstR_2^{RS-SR'}$                    | <i>19280.4</i>      |
|                                                                | <i>9639.0</i>       | -          | $CstR^{RS-H}$                        | <i>9641.2</i>       |
| CstR + 5x<br>GSSH                                              | <i>9671.1</i>       | 32.1       | $CstR^{RS-SH}$                       | <i>9673.3</i>       |
|                                                                | <i>9702.2</i>       | 63.2       | $CstR^{RS-SSH}$                      | <i>9705.3</i>       |

|         |      |                                                      |         |
|---------|------|------------------------------------------------------|---------|
| 19277.1 | -    | CstR <sub>2</sub> <sup>RS-SR'</sup>                  | 19280.4 |
| 19308.4 | 31.3 | CstR <sub>2</sub> <sup>RS-S-SR', R''S-SR'''</sup>    | 19312.5 |
| 19339.9 | 62.8 | CstR <sub>2</sub> <sup>RS-S-SR', R''S-S-SR'''</sup>  | 19344.5 |
| 19373.6 | 96.5 | CstR <sub>2</sub> <sup>RS-S-S-SR', R'S-S-SR'''</sup> | 19376.6 |

**Table S3.** Summary of LC-ESI-MS deconvoluted masses following reaction with either NaHS or Na<sub>2</sub>S<sub>4</sub>. All mass shifts are relative to either the reduced (CsoR<sup>RS-H</sup>) or disulfide bonded form of CsoR (CstR<sub>2</sub><sup>RS-SR'</sup>) as indicated by (-). *Italics* represent species present control samples.

| Protein                                     | M <sub>r</sub> Observed (Da) | Mass Shift | Assignment                                                          | M <sub>r</sub> Expected (Da) |
|---------------------------------------------|------------------------------|------------|---------------------------------------------------------------------|------------------------------|
| CsoR +<br>25x NaSH                          | <i>11035.5</i>               | -          | <i>CsoR<sup>RS-H</sup></i>                                          | <i>11036.6</i>               |
|                                             | 11057.6                      | 22.1       | <i>CsoR<sup>RS-H</sup> + Na</i>                                     | 11056.6                      |
| CsoR + 5x<br>Na <sub>2</sub> S <sub>4</sub> | <i>11037.7</i>               | -          | <i>CsoR<sup>RS-H</sup></i>                                          | <i>11036.6</i>               |
|                                             | 11069.2                      | 31.5       | CsoR <sup>RS-SH</sup>                                               | 11068.7                      |
|                                             | 11101.0                      | 63.3       | CsoR <sup>RS-SH</sup> , CsoR <sup>R'S-SH</sup>                      | 11100.7                      |
|                                             | 11149.6                      | 111.9      | CsoR <sup>RS-SSH</sup> , CsoR <sup>R'S-SH</sup>                     | 11132.8                      |
|                                             | 22075.5                      | -          | CsoR <sub>2</sub> <sup>RS-SR'</sup>                                 | 22071.2                      |
|                                             | 22106.0                      | 30.5       | CsoR <sub>2</sub> <sup>RS-S-SR'</sup>                               | 22103.2                      |
|                                             | 22138.4                      | 62.9       | CsoR <sub>2</sub> <sup>RS-S-SR', R''S-S-SR'''<sup>a</sup></sup>     | 22135.2                      |
|                                             | 22170.0                      | 94.5       | CsoR <sub>2</sub> <sup>RS-S-S-SR', R'S-S-SR'''</sup>                | 22167.3                      |
|                                             | 22202.9                      | 127.4      | CsoR <sub>2</sub> <sup>RS-S-S-SR', R''S-S-S-SR'''</sup>             | 22199.3                      |
|                                             | 22234.3                      | 158.8      | CsoR <sub>2</sub> <sup>RS-S-S-S-SR', R''S-S-S-SR'''</sup>           | 22231.3                      |
|                                             | 22267.1                      | 191.6      | CsoR <sub>2</sub> <sup>RS-S-S-S-S-SR', R''S-S-S-S-SR'''</sup>       | 22263.3                      |
|                                             | 22299.2                      | 223.7      | CsoR <sub>2</sub> <sup>RS-S-S-S-S-SR', R''S-S-S-S-SR'''</sup>       | 22295.4                      |
|                                             | 22331.4                      | 255.9      | CsoR <sub>2</sub> <sup>RS-S-S-S-S-SR', R''S-S-S-S-S-SR'''</sup>     | 22327.4                      |
|                                             | 22363.2                      | 287.7      | CsoR <sub>2</sub> <sup>RS-S-S-S-S-SR', R''S-S-S-S-S-SR''' + S</sup> | 22359.4                      |

<sup>a</sup>No observed reaction of CsoR with 5x NaHS.

**Table S4.** Monoisotopic masses of di-, tri-, and tetrasulfide cross-linked parent ions in the +4 charge state observed by high-resolution tandem mass spectrometry. Asterisks (\*) indicate masses that were assigned as sulfur as opposed to two oxygen atoms based on the fragmentation pattern of the corresponding peptide (see **Fig. 4**, main text, and **Fig. S4**).

| Modification | Monoisotopic Mass (Da) |          |
|--------------|------------------------|----------|
|              | Calculated             | Observed |
| RS-SR'       | 946.978                | 946.977  |
| + O          | 950.977                | 950.976  |
| + 2 O        | 954.976                | 954.969* |
| RS-S-SR'     | 954.972                | 954.969  |
| + 2 O        | 962.969                | 962.963* |
| RS-S-S-SR'   | 962.965                | 962.963  |

**Table S5.** Primer sequences used in this study.

| Primer                                                           | Direction | Sequence                                                             |
|------------------------------------------------------------------|-----------|----------------------------------------------------------------------|
| <i>For construction of S. aureus Newman cst deletion strains</i> |           |                                                                      |
| $\Delta tauE$ 5'                                                 | F         | GGGGACCACTTTGTACAAGAAAGCTGGGTGTTACATCTTTTCCAGCAGCTCTAGCACC           |
|                                                                  | R         | ACTGCCCGGGAATATCCATTACTTACTTTTCACCAATAAGTTTACAGC                     |
| $\Delta tauE$ 3'                                                 | F         | ACTGCCCGGGCTCATTTTATAAACTAATCCTTTTAACTCAGACAGC                       |
|                                                                  | R         | GGGGACAAGTTTGTACAAAAAAGCAGGCTGAAGAAGGATATATAAAAGA AATAGTAGGAAGATTGCC |
| $\Delta cstA$ 5'                                                 | F         | ACTGCCCGGGGTATTGTTTCATAATAACCTCCCTAAAAATACCTG                        |
|                                                                  | R         | GGGGACAAGTTTGTACAAAAAAGCAGGCTCCCTATTGGAGCAAATATAA TACTCCCTATTATAAGG  |
| $\Delta cstA$ 3'                                                 | F         | GGGGACCACTTTGTACAAGAAAGCTGGGTAATGATTCTGGAAAATCTTGA TAGCCTTC          |
|                                                                  | R         | ACTGCCCGGGTTTATCTAATTAATCTATTAATAAAAGGAGTTGTTATCAT G                 |
| $\Delta cstB$ 5'                                                 | F         | TTATTTTAATGATTCTGGGTAAAACCTGTTTAAAAAACATGATAACAAC TC                 |
|                                                                  | R         | GGGGACCACTTTGTACAAGAAAGCTGGGTGACGTTAGAACAGAAGAGGA GTATGCATTAGG       |
| $\Delta cstB$ 3'                                                 | F         | GGGGACAAGTTTGTACAAAAAAGCAGGCTCCAGTAACAATAGGGCATGA AGTATAACCATC       |
|                                                                  | R         | TTTTTTAAACAGTTTTACCCAGAATCATTAATAAATTTAAGGATGTGG                     |
| $\Delta SQR$ 5'                                                  | F         | TAATCCTTTTAGCATGCCAATTTGATAATGCTTATTCATTTTTTCCAC                     |
|                                                                  | R         | GGGGACCACTTTGTACAAGAAAGCTGGGTGCATACTCCAGGACACACGC CTG                |
| $\Delta SQR$ 3'                                                  | F         | GGGGACAAGTTTGTACAAAAAAGCAGGCTAACTATTAGATCTATTGAGA TTGCATTTATCATTG    |
|                                                                  | R         | AATAAGCATTATCAAATTGGCATGCTAAAAGGATTAATATAATAAAGTAC                   |
| <i>For construction of pOSI complementation plasmids</i>         |           |                                                                      |

|                                                   |   |                                                             |
|---------------------------------------------------|---|-------------------------------------------------------------|
| CstR                                              | F | GCGCGCATATGAATTATGATAAAAAAATGATTAATC                        |
|                                                   | R | GCGCGGGATCCTTACTTACTTTTCACCAATAAGTTTAC                      |
| CstA                                              | F | ACGTTACATATGAAACAATACGGAGAAAAGTTTATC                        |
|                                                   | R | GGGATGGATCCTTAGATAAAATAAATTATGATTTCGC                       |
| CstB                                              | F | CCGCTCGAGTTTTTTAAACAGTTTTACGATAATCATTATCTCAAGC              |
|                                                   | R | CGCGGATCCTTATTTTAATGATTCTGGAAAATCTTGATAGCC                  |
| SQR                                               | F | CGCATGCTCGAGGAAAAAATGAATAAGC                                |
|                                                   | R | CGCGGATCCTTATATTAATCCTTTTAGCATG                             |
| CsoR                                              | F | GATAAATACAATTGAGGTGAACATATGGGATATAGTATAGTAAGGAATG<br>TAAATG |
|                                                   | R | CCCCTTGTTTGGATCCTCGAGCATATTAGTCTTTAATCAATTTTTGAAAAG<br>TCAC |
| <i>For construction of CstR cysteine mutants</i>  |   |                                                             |
| C31A                                              | F | GGAGGAAGGAAAAGACTGTAAAGATGTCATTAC                           |
|                                                   | R | GTAATGACATCTTTACAGTCTTTTCCTTCCTCC                           |
| C60A                                              | F | GGAGGAAGGAAAAGACGCTAAAGATGTCATTAC                           |
|                                                   | R | GTAATGACATCTTTAGCGTCTTTTCCTTCCTCC                           |
| <i>For insertion of XhoI site in pOS1 plasmid</i> |   |                                                             |
| pOS1 XhoI<br>Quikchange                           | F | GGTGAACATATGCTCGAGTCTAGAGGATCCAACAAGGGGG                    |
|                                                   | R | CCCCCTTGTTTGGATCCTCTAGACTCGAGCATATGTTTACC                   |
| <i>For Sequencing pOS1-pLgt Plasmids</i>          |   |                                                             |
| Seq.                                              | F | TAAGAAGAGATGTAAGAGTAG                                       |
|                                                   | R | GATAGAAAAGGGGG                                              |
| <i>For qRT-PCR experiments</i>                    |   |                                                             |
| 16S rRNA                                          | F | GCTGCAGCTAACGCATTAAGCACT                                    |
|                                                   | R | TTAAACCACATGCTCCACCGCTTG                                    |
| TauE                                              | F | GCACCACCTGCACCTACTATAC                                      |
|                                                   | R | TGAAACCTAGTTCCGAAAAGTC                                      |
| CstR                                              | F | CGTATTAATAGAATACAAGGGCAACTAAATG                             |
|                                                   | R | CTCTTTGATGCACTTATTTGTGTAATGACATC                            |
| CstA                                              | F | GAAGAAGAAAACGATAGTTATG                                      |
|                                                   | R | GGCCCTGGACATTGAAGACC                                        |
| CstB                                              | F | AGCGCGAAACAAATGTATGA                                        |
|                                                   | R | CTTTACCACAAGGGCTTCCA                                        |
| SQR                                               | F | TGTGATATATGCAACGCCAAA                                       |
|                                                   | R | CCGTCGATTTCAACAAGGTT                                        |
| CopA                                              | F | GCTGCAGCTAACGCATTAAGCACT                                    |
|                                                   | R | TTAAACCACATGCTCCACCGCTTG                                    |
| <i>For fluorescence anisotropy titrations</i>     |   |                                                             |
| cst OP1                                           | F | ATGTGTCAAATACCCCTAGAGGTATTTG                                |
|                                                   | R | F-CAAATACCTCTAGGGGTATTTGACACAT                              |

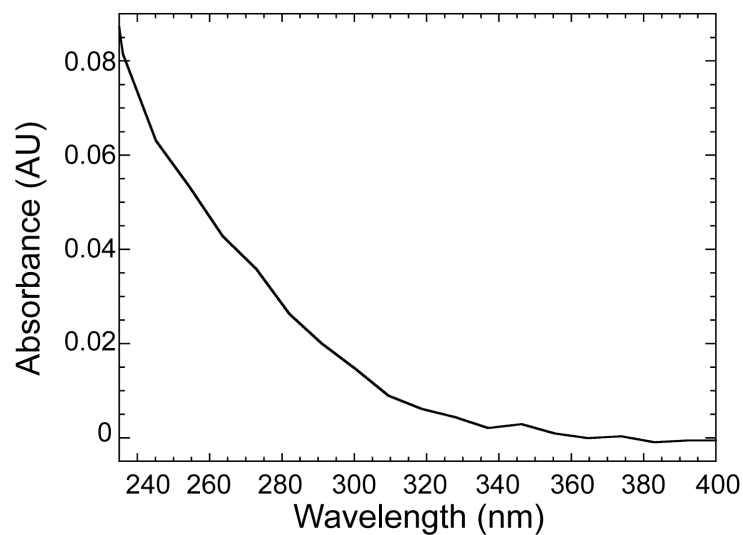

**Figure S1. CstR forms a complex with Cu(I).** Apoprotein (20  $\mu$ M protomer)-subtracted UV-Vis spectrum of a 1:1 Cu(I):CstR mixture. This spectrum is characterized by intense absorption from  $S^-$  to Cu(I) ligand-to-metal or metal-to-ligand charge transfer transitions in the UV region (Liu *et al.*, 2007, Ma *et al.*, 2009) consistent with Cu(I)-thiolate coordination bonds.

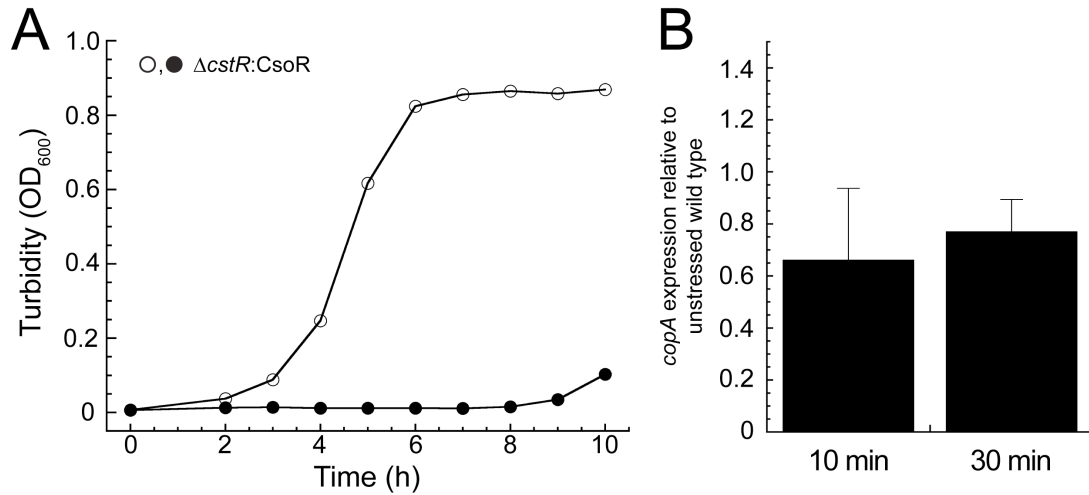

**Figure S2.  $\Delta cstR$  *S. aureus* complemented with *csoR* ( $\Delta cstR:CsoR$ ) does not recover normal growth and *copA* is not induced under NaHS stress in WT cells.** (A)  $\Delta cstR$  strain transformed with the pOS1 plasmid expressing the copper sensor CsoR from *S. aureus* strain Newman (Grossoehme *et al.*, 2011) does not complement the severe growth phenotype observed for the  $\Delta cstR$  strain (see **Fig. 1B**, main text) in the presence of 0.2 mM NaHS (*filled circles*) vs. absence of added NaHS (*open circles*). Cultures were grown in HHMw+TS growth medium as described in the main text. (B) qRT-PCR of *copA* mRNA in WT *S. aureus* following addition of 0.2 mM NaHS stress is not induced, further establishing no *in vivo* crosstalk between CsoR and CstR regulatory pathways. *copA* is under the control of CsoR (Grossoehme *et al.*, 2011). Aliquots were removed before and 10 and 30 min post addition of 0.2 mM NaHS at OD<sub>600</sub>≈0.2 and qRT-PCR performed as described (see Experimental Procedures)



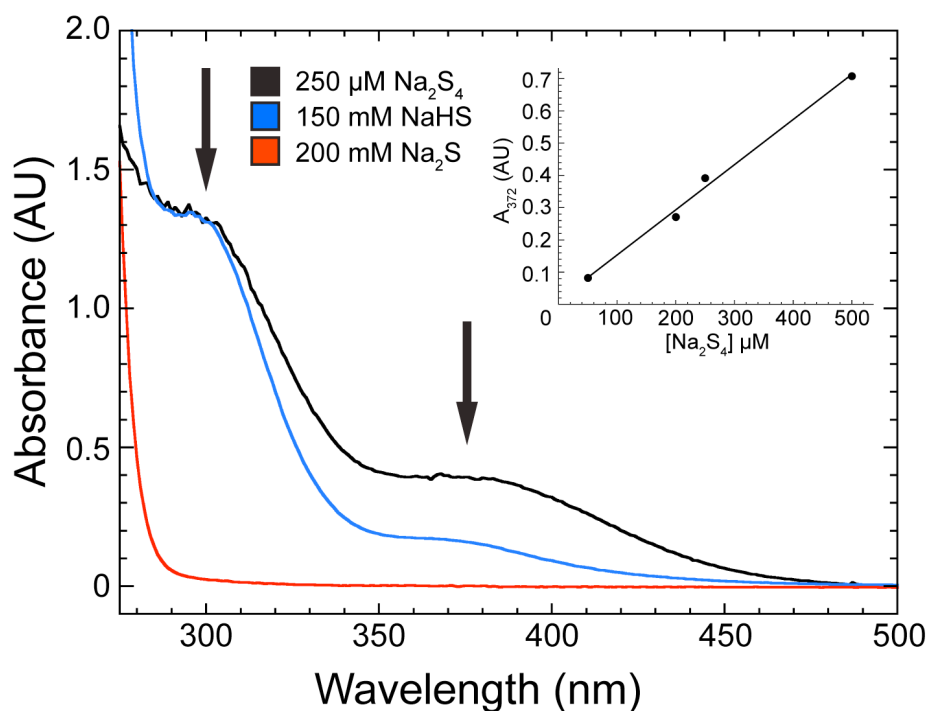

**Figure S3. UV Vis spectra of sulfur sources used in this study.** Na<sub>2</sub>S<sub>4</sub> (black), NaHS (blue), and Na<sub>2</sub>S (red) were prepared anaerobically in fully degassed 10 mM Tris-HCl at pH 8.0 containing 1 mM EDTA. The commercial preparation of commercial NaHS (see Experimental Procedures, main text) used here is contaminated with detectable (0.3%) polysulfide as determined by a Na<sub>2</sub>S<sub>4</sub> standard curve (*inset*) and gives off a light yellow hue. The yellow coloring is not present in crystalline Na<sub>2</sub>S (*red* curve). Arrows indicate locations of characteristic disulfide peaks at 300 and 372 nm (Debiegge-Chouvy *et al.*, 2004, Greiner *et al.*, 2013).

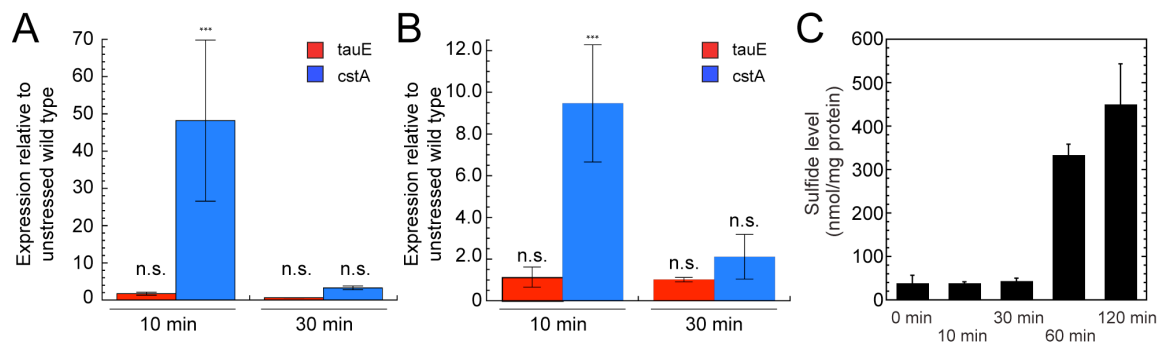

**Figure S4. Polysulfide ( $Na_2S_4$ ) and disodium sulfide ( $Na_2S$ ) induce the *cst* operon.** Wild-type (WT) *S. aureus* cultures grown to an  $OD_{600}$  of  $\approx 0.2$  and challenged with  $25 \mu M Na_2S_4$  (A) or  $0.15 mM Na_2S$  (B). Aliquots were removed before and 10 and 30 min post addition of  $Na_2S_4$  or  $Na_2S$ . RT-PCR was performed as described (see Experimental Procedures) (\*\*\*) indicates  $p < 0.001$ ). (C) Sulfide concentrations from  $t=0$  to  $t=120$  min induction of the *cst* operon with  $25 \mu M Na_2S_4$ . Although the kinetics of intracellular  $HS^-$  accumulation are slower than observed upon addition of NaHS to cells (see Fig. 4A) sulfide ultimately accumulates to the same level of  $\approx 400 \text{ nmol mg}^{-1}$  protein.

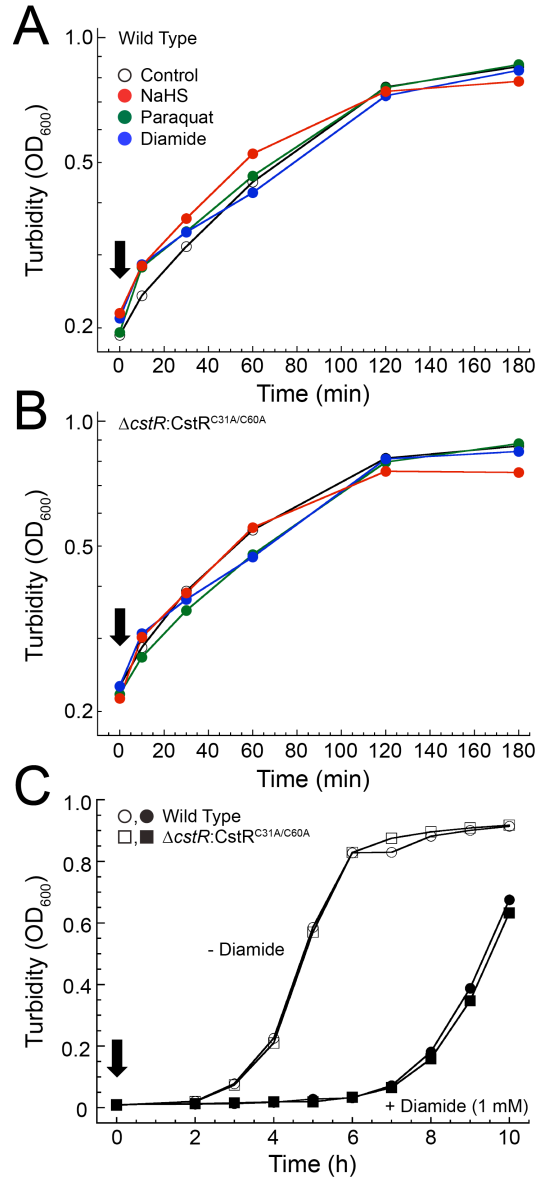

**Figure S5. *Staphylococcus aureus* growth rates are not impacted by addition of oxidative stressors and growth under diamide stress is not *cst*-operon dependent.** Addition of *cst* operon inducers NaHS or diamide and non-inducers have no growth phenotype when added to mid-log cells (marked by the arrow, OD<sub>600</sub>≈0.2). Both WT (**A**) and  $\Delta cstR:CstR^{C31A/C60A}$  (**B**) strains were tested with the addition of 0.2 mM NaSH (red), 1.0 mM diamide (blue), or 25 nM paraquat (green) vs. untreated cells (black). (**C**) Diamide was added to a final concentration of 1 mM at the beginning of the growth (marked by the arrow, filled symbols) induces a growth phenotype that is equivalent in WT (circles) and  $\Delta cstR:CstR^{C31A/C60A}$  (squares) strains. Thus, although diamide weakly induces the operon (**Fig. 2**, main text) expression of *cst* operon is not likely essential for survival under diamide stress, in contrast to sulfide stress.

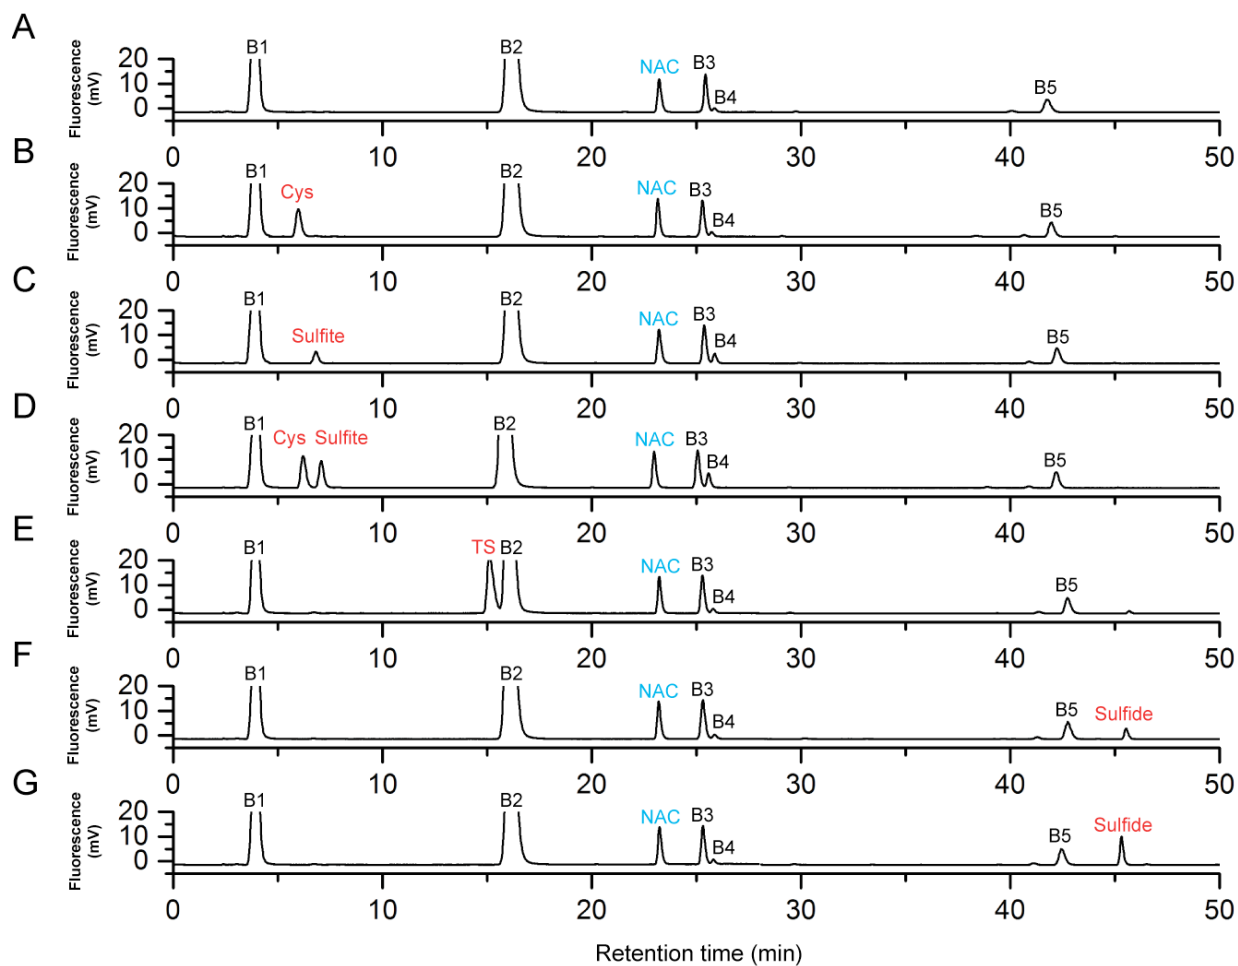

**Figure S6. Fluorescence-detected reverse phase HPLC chromatograms of standard compounds used in the identification of major LMW sulfur-containing monobromobimane (mBBr) derivatives (-mB) from *S. aureus* cellular lysates. (A) Monobromobimane (mBBr) labeling of buffer components (B, “background”) are attributed to the hydrolysis products of monobromobimane (B1 and B2), acetic acid (B3 and B4), and unreacted monobromobimane (B5) as determined by mass spectrometry. (B) 20  $\mu$ M cysteine; (C) 20  $\mu$ M sulfite; (D) 20  $\mu$ M sulfite + 20  $\mu$ M cysteine; (E) 20  $\mu$ M TS; (F) 20  $\mu$ M NaHS; (G) 5  $\mu$ M Na<sub>2</sub>S<sub>4</sub>. NAC, *N*-acetyl-*L*-cysteine, used as an internal recovery standard**

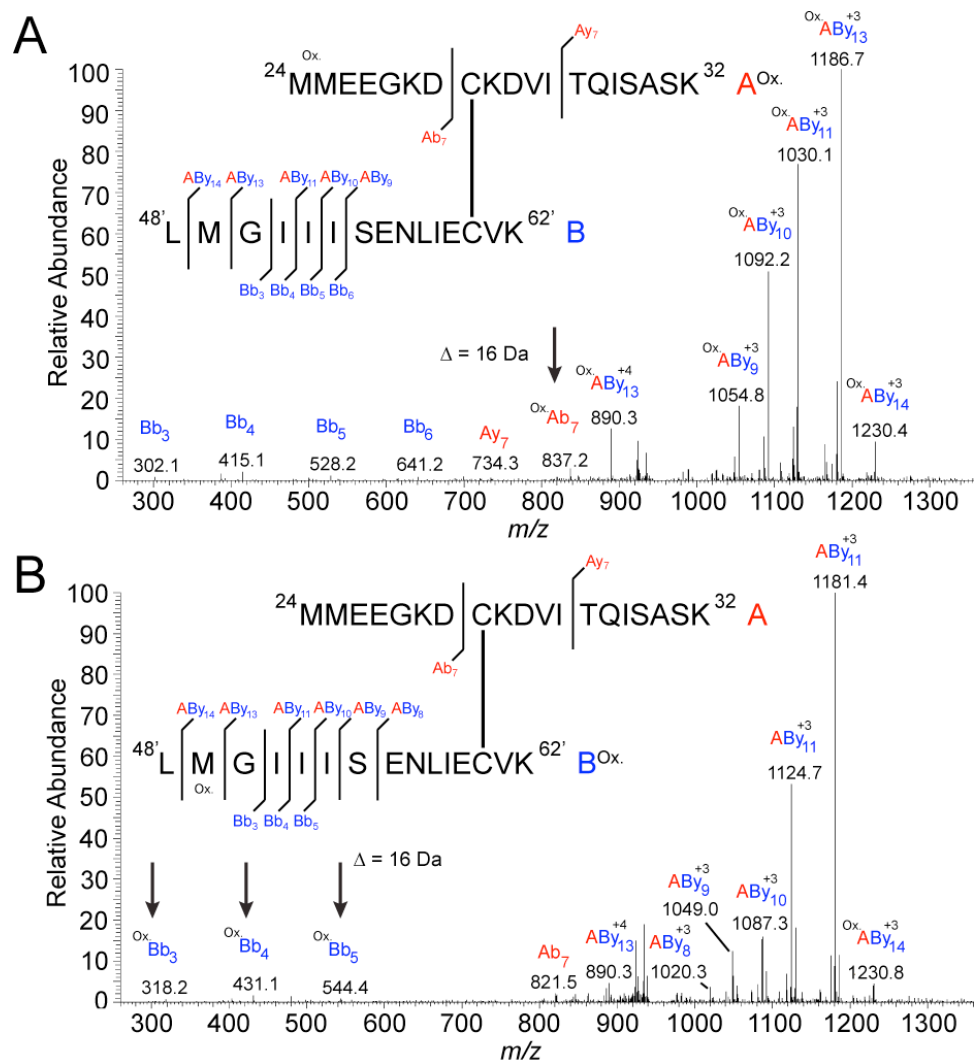

**Figure S7. Fragmentation data of sulfide-treated CstR samples can not be attributed to Met oxidation of disulfide-bonded Cys31-Cys60' cross-linked peptides.** Cross-linked peptides containing a single Met oxidation event on either the A peptide (A) or on the B-peptide (B) were identified from an aerobically-digested sample. The parent ions each have a mass of 950.977 Da (950.996 Da expected) in the +4 charge state but are differentiated from sulfur (S) adducted crosslinked peptides by their unique fragmentation pattern. For example, the  $Ab_7$  fragment contains the "A" peptide Met residue with a mass of 821.3 Da and 837.3 Da for the reduced and oxidized forms, respectively. If two oxidations occur on the "A" peptide, the expected mass is 853.3 Da (panel A). An analogous Met oxidation analysis can potentially be found for the "B" peptide with the  $Bb_{3-6}$  (panel B). If the parent ion contained a +32 Da shift and the Met residues in the fragmentation spectra display a combined +32 Da or +64 Da mass shift, the shifts would be attributed to Met oxidation and not a trisulfide or tetrasulfide crosslinked Cys31-Cys60' peptide, respectively. These data ensure that the +32 Da and +64 Da shifts observed in so-designated trisulfide and tetrasulfide cross-linked peptides (see Fig. 4B, main text) are due to sulfur and not multiple Met oxidation events.

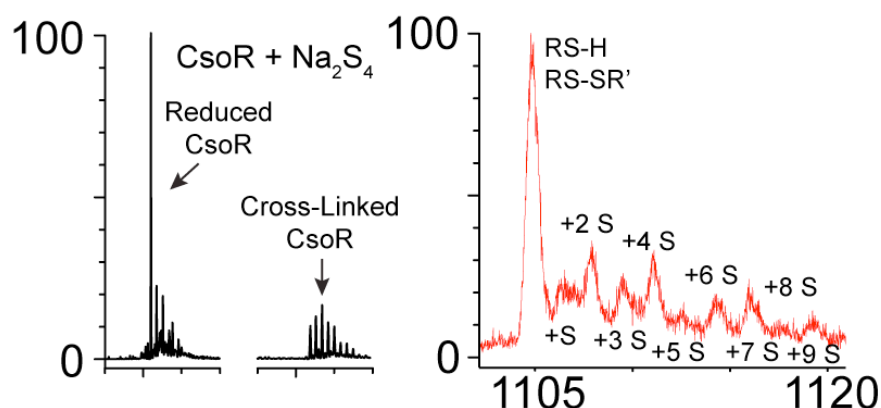

**Figure S8. LC-ESI mass spectra of CsoR following reaction with Na<sub>2</sub>S<sub>4</sub>.** The *S. aureus* Cu(I) sensor CsoR was reacted with a 5-fold excess of Na<sub>2</sub>S<sub>4</sub> for 17 h and analyzed by LC-ESI-MS. Mass to charge ratios (red) indicate the formation of a series of sulfur cross-linked CsoR protomers with up to nine total sulfur atoms. Deconvoluted spectra (black) indicate the relative abundance of reduced to cross-linked species. In this experiment, it is impossible to determine which sulfurs or how many are involved in cross-linking or as sulfur chains on non-cross-linked cysteines. For a complete mass list, please refer to Table S3.

## References

- Debiemme-Chouvy, C., C. Wartelle & F.-X. Sauvage, (2004) First Evidence of the Oxidation and Regeneration of Polysulfides at a GaAs Electrode, under Anodic Conditions. A Study by in Situ UV-Visible Spectroelectrochemistry. *J. Phys. Chem. B* **108**: 18291-18296.
- Fahey, R.C. & G.L. Newton, (1987) Determination of low-molecular-weight thiols using monobromobimane fluorescent labeling and high-performance liquid chromatography. *Methods Enzymol.* **143**: 85-96.
- Greiner, R., Z. Palinkas, K. Baesell, D. Becher, H. Antelmann, P. Nagy & T.P. Dick, (2013) Polysulfides Link H<sub>2</sub>S to Protein Thiol Oxidation. *Antioxid. Redox Signal.* **19**: 1749-1762.
- Grossoehme, N., T.E. Kehl-Fie, Z. Ma, K.W. Adams, D.M. Cowart, R.A. Scott, E.P. Skaar & D.P. Giedroc, (2011) Control of copper resistance and inorganic sulfur metabolism by paralogous regulators in *Staphylococcus aureus*. *J. Biol. Chem.* **286**: 13522-13531.
- Liu, T., A. Ramesh, Z. Ma, S.K. Ward, L. Zhang, G.N. George, A.M. Talaat, J.C. Sacchettini & D.P. Giedroc, (2007) CsoR is a novel *Mycobacterium tuberculosis* copper-sensing transcriptional regulator. *Nat. Chem. Biol.* **3**: 60-68.
- Luebke, J.L., R.J. Arnold & D.P. Giedroc, (2013) Selenite and tellurite form mixed seleno- and tellurotrisulfides with CstR from *Staphylococcus aureus*. *Metallomics* **5**: 335-342.
- Ma, Z., D.M. Cowart, R.A. Scott & D.P. Giedroc, (2009) Molecular insights into the metal selectivity of the copper(I)-sensing repressor CsoR from *Bacillus subtilis*. *Biochemistry* **48**: 3325-3334.
